# Supplementary material for: Long-term exposure of K562 cells to benzene metabolites inhibited erythroid differentiation and elevated methylation in erythroid specific genes
Source: Royal Society of Chemistry journal article supplement (doi:10.1039/c6tx00143b), 2016-01-01
Supplement: c6tx00143b1.pdf [file c6tx00143b1.pdf]

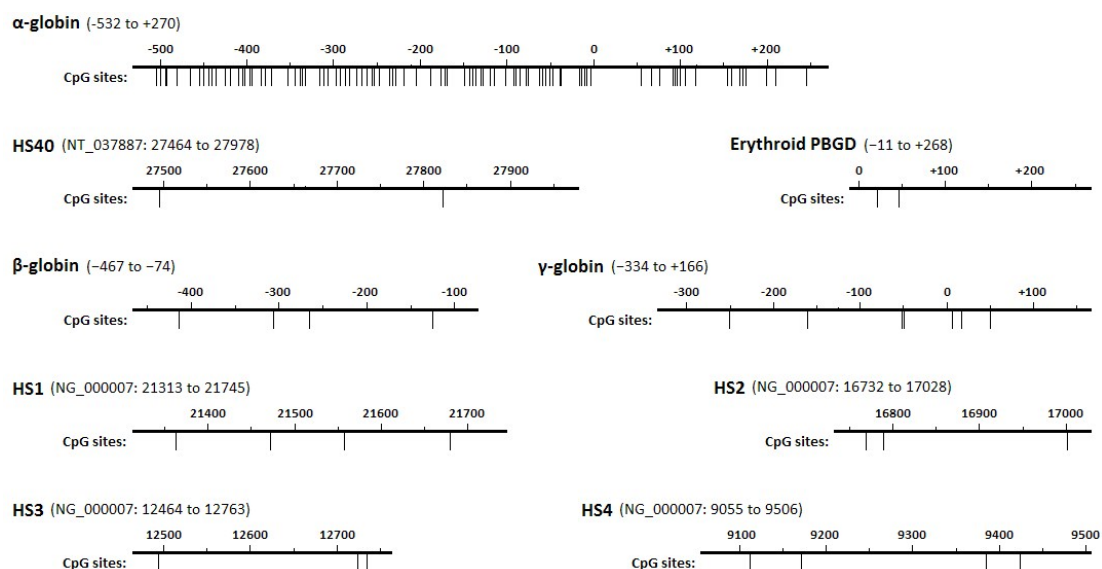

**Fig. S1 The erythroid genes and their far-upstream regulatory elements in which the DNA methylation levels were analyzed in this study.** The black line indicated the length of analyzed sequence of each genes or regulatory elements. The below black bars indicated CpG sites in analyzed sequences.
